# Supplementary material for: Morphological evolution of the 2021 Tajogaite cone (Cumbre Vieja, La Palma, Spain) between January 2022 and July 2024: a quantitative UAS study
Source: Research Square preprint supplement (doi:10.21203/rs.3.rs-8768044/v1), 2026-02-06
Supplement: Supplementary file 1 [file 01b5d9a2d4138ab5acbfee21.docx]

Bulletin of Volcanology

Supporting Information for

**Morphological evolution of the 2021 Tajogaite cone (Cumbre Vieja, La Palma, Spain) between January 2022 and July 2024: a quantitative UAS study**

R. Civico1*, T. Ricci1, U. Kueppers2*, V. Ortega-Ramos3, M. Przeor3,4, J. Taddeucci1, I. Cabrera-Pérez3,5, W. Stoiber2, P. Scarlato1, L. D’Auria3,6

1 Istituto Nazionale di Geofisica e Vulcanologia, Sezione Roma 1, Roma, Italy

2 Department of Earth and Environmental Sciences, Ludwig-Maximilians-Universität München, Munich, Germany

3 Instituto Volcanológico de Canarias (INVOLCAN), Puerto de la Cruz, Tenerife, Canary Islands, Spain

4 Invert Sàrl, Echichens, Switzerland

5 Department of Earth Sciences, University of Geneva, Rue des Maraîchers 13, 1205, Geneva, Switzerland

6 Instituto Tecnológico y de Energías Renovables (ITER), Granadilla de Abona, Tenerife, Canary Islands, Spain

**Contents of this file**

Figures and captions S1, S2 and S4

Caption for S3 (movie)


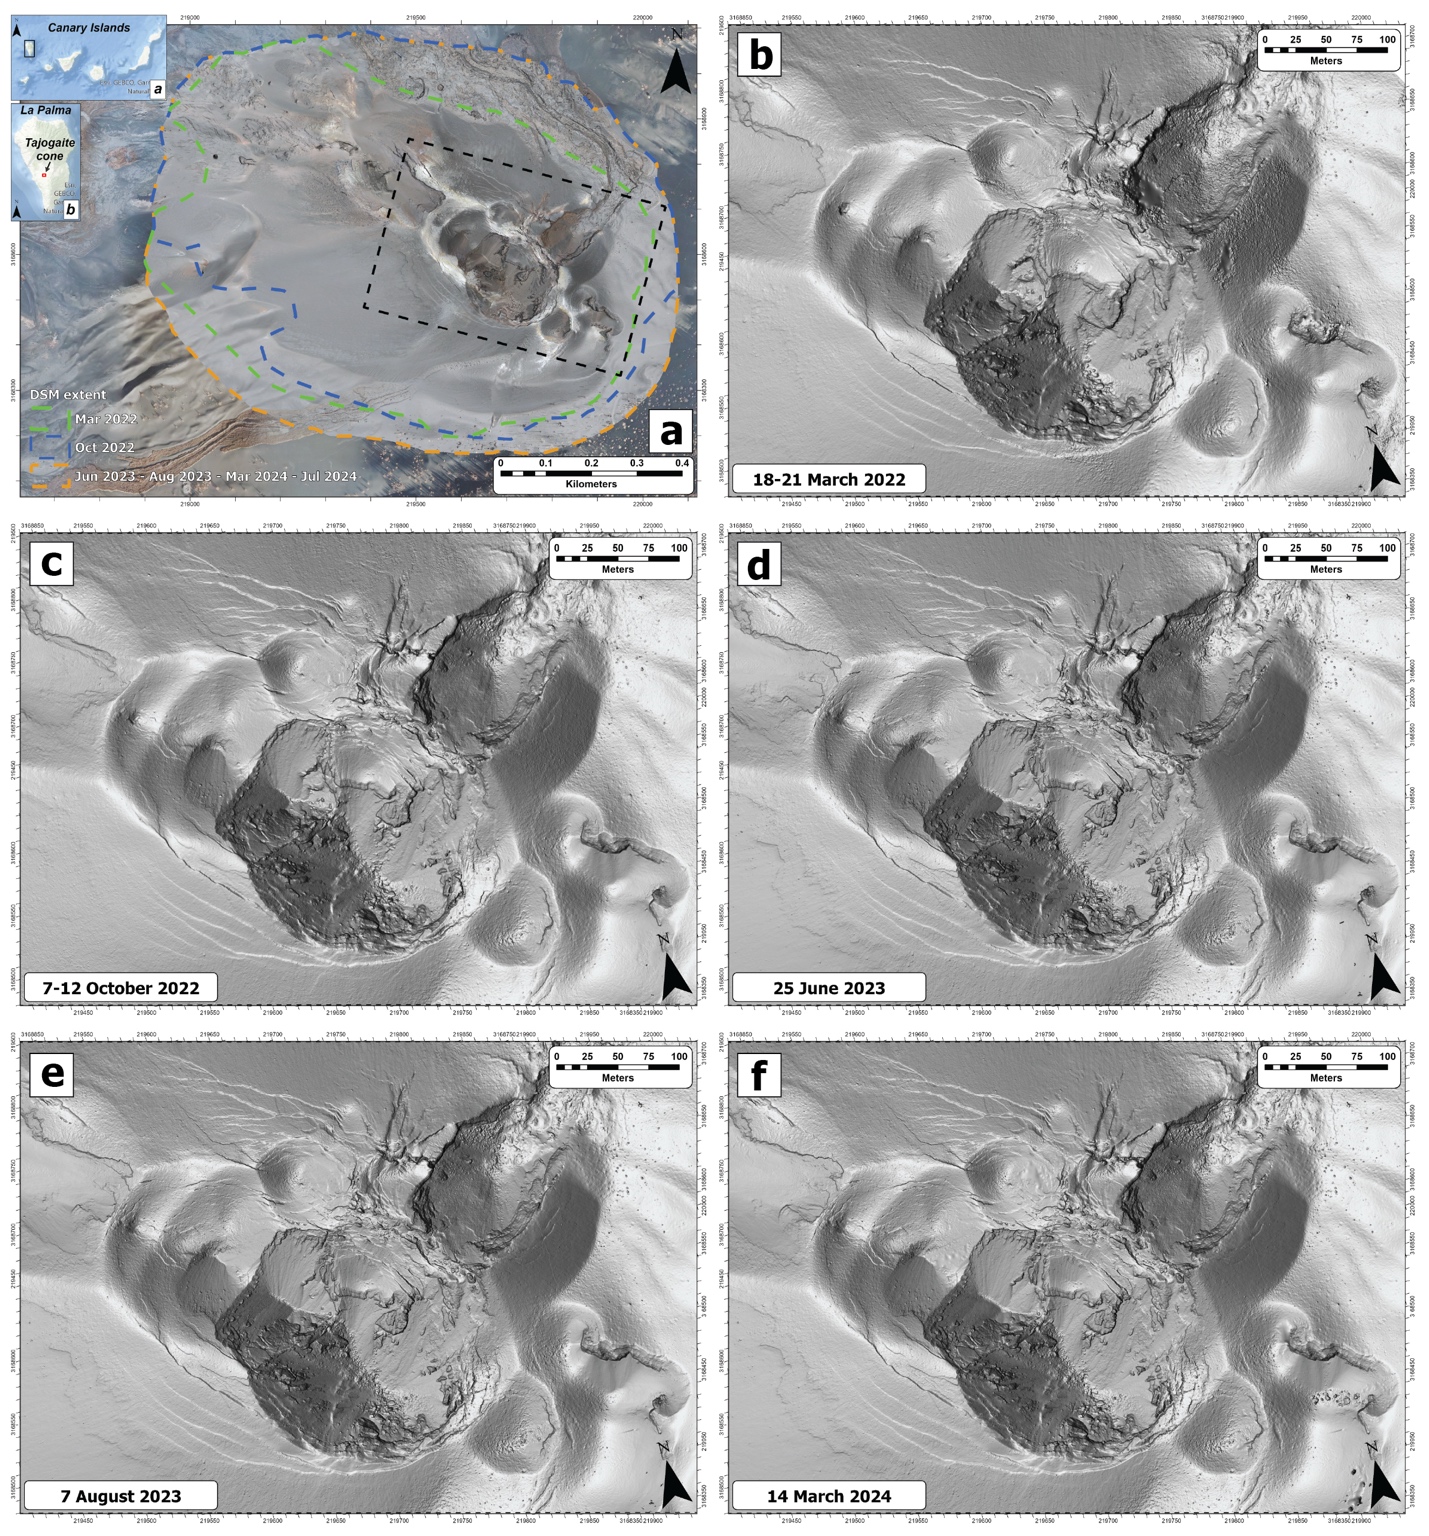


*Figure S1 - a) Location of La Palma within the Canary Islands archipelago; b) La Palma Island and location of the Tajogaite cone; c) View of the Tajogaite cone in July 2024 and extent of the area covered by six subsequent UAS surveys. Dashed-line boxe indicates the position of figure S1 b,c,d,e,f. B,c,d,e and f) Multidirectional hillshades of the DSMs of the Tajogaite cone.*

*
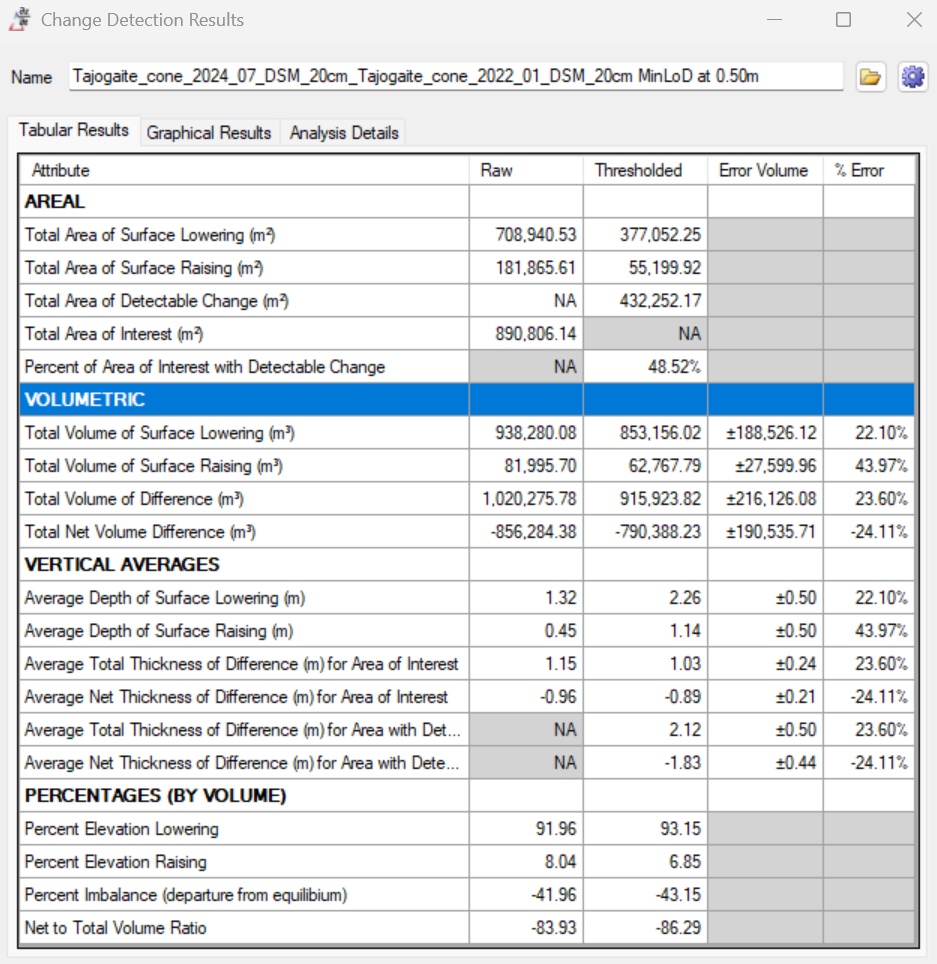
*

*Figure S2 - Change detection results for the period January 2022 - July 2024.*

*Movie S3 – Animation of the multidirectional DSMs’ hillshades of the Tajogaite cone. At both the beginning and the end of the animation the volcano-tectonic feature of Fig. 5 is shown.*


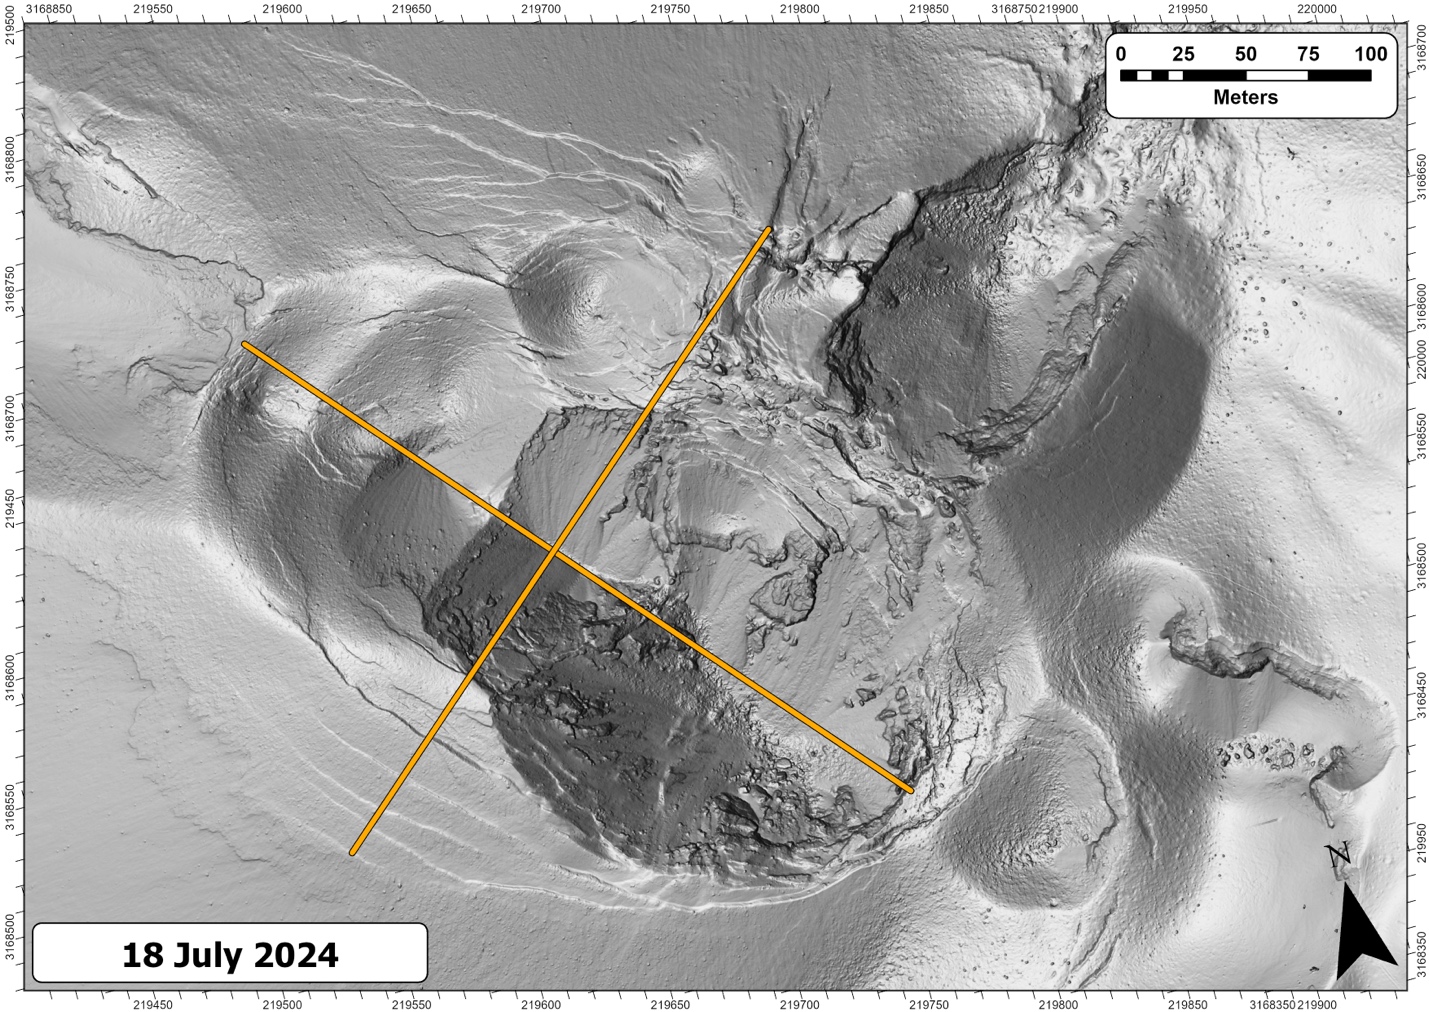


*Figure S4 - Long (NW-SE - 320m) and short (SW-NE - 300m) axis of the elliptic horizontal area described in Section 4.4.*
